# Supplementary material
Source: publisher site journal article supplement (doi:10.18632/aging.204241)
Supplement: Supplementary file 2 [file aging-v14-204241-supplementary-material-SD1.pdf]

SUPPLEMENTARY FIGURES

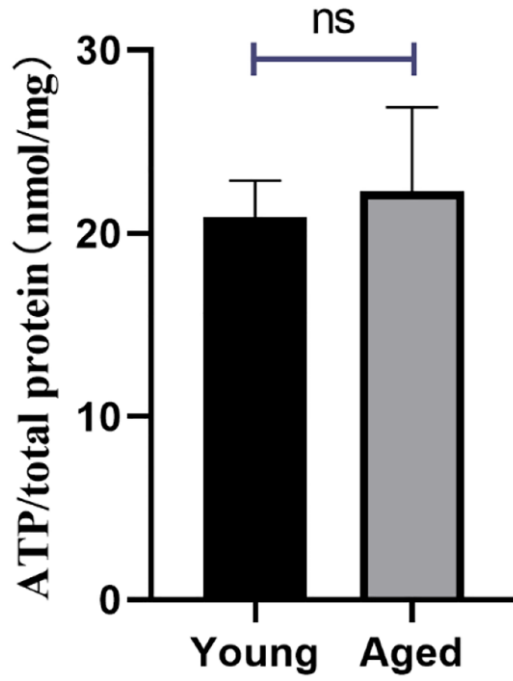

Supplementary Figure 1. The intracellular ATP level of young and aged astrocytes.

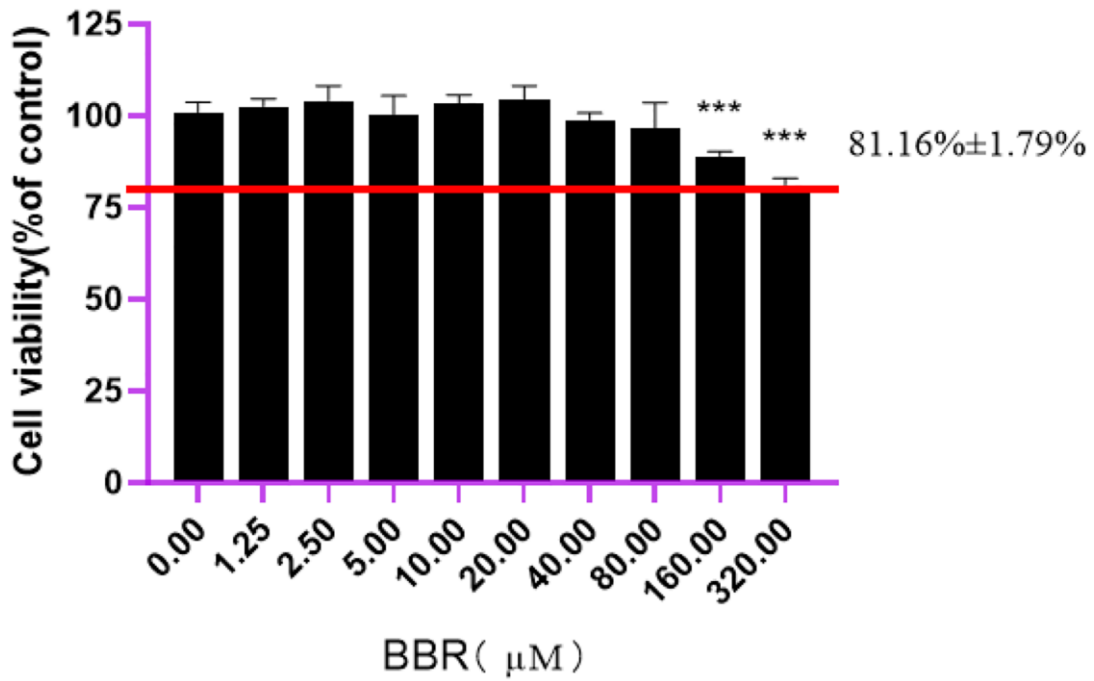

Supplementary Figure 2. The viability of astrocytes treated with different concentration of berberine
